# Supplementary material
Source: publisher figshare collection journal article supplement (https://sage.figshare.com/ndownloader/files/12419741)
Supplement: Supplementary file 1 [file 12419741]

**Appendix Table A1.** Modified ICRS Gross Grading Scale (Wayne scoring system) <sup>1</sup>

| Feature Score                | Score     |
|------------------------------|-----------|
| <b>Coverage</b>              |           |
| >75% fill                    | 4         |
| 50-75% fill                  | 3         |
| 25-50% fill                  | 2         |
| <25% fill                    | 1         |
| No fill                      | 0         |
| <b>Neocartilage color</b>    |           |
| Normal                       | 4         |
| 25% yellow/brown             | 3         |
| 50% yellow/brown             | 2         |
| 75% yellow/brown             | 1         |
| 100% yellow/brown            | 0         |
| <b>Defect margins</b>        |           |
| Invisible                    | 4         |
| 25% circumference visible    | 3         |
| 50% circumference visible    | 2         |
| 75% circumference visible    | 1         |
| Entire circumference visible | 0         |
| <b>Surface</b>               |           |
| Smooth/level with normal     | 4         |
| Smooth but raised            | 3         |
| Irregular 25-50%             | 2         |
| Irregular 50-75%             | 1         |
| Irregular >75%               | 0         |
| <b>Total</b>                 | <b>16</b> |

ICRS, International Cartilage Repair Society

**Appendix Table A2.** ICRS Visual Histological Assessment Scale\*

| Feature                              | Score |
|--------------------------------------|-------|
| <b>I. Surface</b>                    |       |
| Smooth/continuous                    | 3     |
| Discontinuities/irregularities       | 0     |
| <b>II. Matrix</b>                    |       |
| Hyaline                              | 3     |
| Mixture: hyaline/fibrocartilage      | 2     |
| Fibrocartilage                       | 1     |
| Fibrous tissue                       | 0     |
| <b>III. Cell distribution</b>        |       |
| Columnar                             | 3     |
| Mixed/columnar-clusters              | 2     |
| Clusters                             | 1     |
| Individual cells/disorganized        | 0     |
| <b>IV. Cell population viability</b> |       |
| Predominantly viable                 | 3     |
| Partially viable                     | 1     |
| <10% viable                          | 0     |
| <b>V. Subchondral Bone</b>           |       |
| Normal                               | 3     |
| Increased remodeling                 | 2     |
| Bone necrosis/granulation tissue     | 1     |
| Detached/fracture/callus at base     | 0     |

---

**VI. Cartilage mineralization (calcified cartilage)**

|                                 |           |
|---------------------------------|-----------|
| Normal                          | 3         |
| Abnormal/inappropriate location | 0         |
| <b>Total</b>                    | <b>18</b> |

---

ICRS, International Cartilage Repair Society

\*The observer attempted to evaluate one feature at a time. The most prominent feature on each specimen was matched to a graded panel of images that it most closely resembled. The highest score (3) was applied to the ideal repair result (i.e., truly regenerated tissue), and the lowest score (0) was applied to the poorest repair result.
